# Supplementary material
Source: Springer Nature journal article supplement (https://www.springermedizin.de/resource/supplementary/12885_2013_3987_MOESM6_ESM.pdf/9464842)

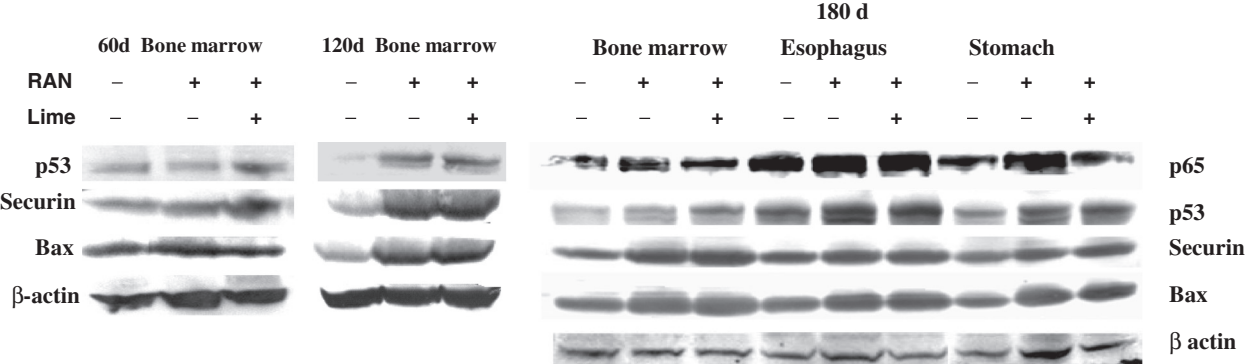

Control  
 RAN 180D  
 RAN+L 180D

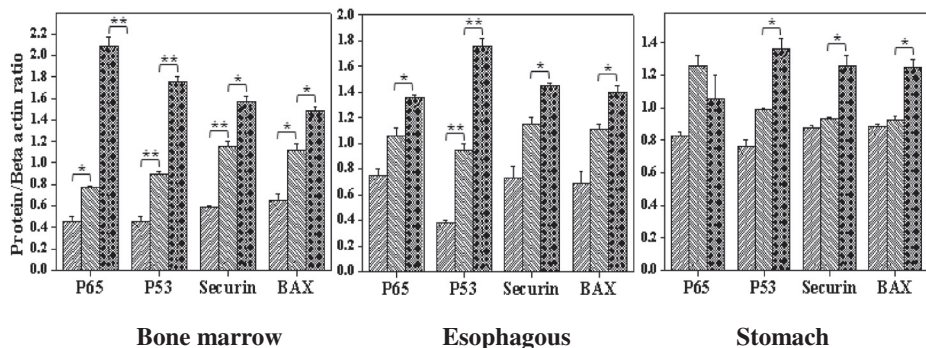

Supplement: MOESM6 [file 9464842]
